# Supplementary material for: Asprosin response in hypoglycemia is not related to hypoglycemia unawareness but rather to insulin resistance in type 1 diabetes
Source: PubMed Central journal article supplement (PMC6752946; doi:10.1371/journal.pone.0222771), 2019-09-19
Supplement: pone.0222771.s001.pdf [file pone.0222771.s001.pdf]

## Supporting information

### S1 Table. Inclusion criteria.

---

#### **Inclusion criteria for participants without hypoglycemia unawareness**

- Age between  $\geq 18$  and  $\leq 75$  years
- BMI between 20 und 35 kg/m<sup>2</sup>
- Persons with manifest diabetes mellitus type 1 and diagnosis according to DDG guidelines 2018 oGTT, HbA1c  $\geq 6.5\%$  in the absence of adulteration of the HbA1c, over 200 mg / dl in the 2 hour value of the oGTT, fasting glucose > 126 mg/dl, spontaneous glucose > 200 mg/dl at least twice).

#### **Inclusion criteria for participants with hypoglycemia unawareness**

- Persons who are not aware of hypoglycemia symptoms at glucose levels below 50 mg / dl
  - Age between  $\geq 18$  and  $\leq 75$  years
  - BMI between 20 und 35 kg/m<sup>2</sup>
  - Persons with manifest diabetes mellitus type 1 and diagnosis according to DDG guidelines 2018 oGTT, HbA1c  $\geq 6.5\%$  in the absence of adulteration of the HbA1c, over 200 mg / dl in the 2 hour value of the oGTT, fasting glucose > 126 mg/dl, spontaneous glucose > 200 mg/dl at least twice.
-
