# Supplementary material for: Asprosin response in hypoglycemia is not related to hypoglycemia unawareness but rather to insulin resistance in type 1 diabetes
Source: PubMed Central journal article supplement (PMC6752946; doi:10.1371/journal.pone.0222771), 2019-09-19
Supplement: pone.0222771.s002.pdf [file pone.0222771.s002.pdf]

## S2 Table. Exclusion criteria.

---

### General exclusion criteria

- Secondary types of diabetes (ADA-criteria type 3 B-H)
  - Current pregnancy
  - Acute infections / fever
  - Immune-suppressant therapy
  - Severe psychiatric diseases requiring treatment (for example personality disorders, schizophrenia, depression)
  - Known alcohol or drug dependency
  - Severe heart-, kidney-, or liver-insufficiency:
    - NYHA stadium IV
    - Non-diabetic liver disease (for example PBC, PSC, Wilson's disease, hemochromatosis, autoimmune hepatitis)
    - severe peripheral artery disease (stadium IV)
    - non-diabetic glomerulopathy
  - Cancer or other malignant diseases within the last 5 years
  - Infectious diseases like hepatitis B, C, E, or HIV
  - Other severe autoimmune diseases
  - Current participation in an interventional study
  - Anemia or disorders of bone marrow
  - Exclusion criteria for clamp study
  - Past history of deep vein thrombosis or pulmonary embolism
  - Routine lab results  $\leq 80\%$  below lower reference value: Ferritin, iron, leucocytes, haemoglobin, hematocrit, RBC, platelets, blood alcohol levels.
  - Exclusion criteria for bioimpedance measurement
  - Pacemaker / ICD
  - Exclusion criteria for lung function testing
  - Ignoring or non-understanding of the instructions
-
