# Supplementary material for: Asprosin response in hypoglycemia is not related to hypoglycemia unawareness but rather to insulin resistance in type 1 diabetes
Source: PubMed Central journal article supplement (PMC6752946; doi:10.1371/journal.pone.0222771), 2019-09-19
Supplement: pone.0222771.s003.pdf [file pone.0222771.s003.pdf]

**S3 Table. Complete raw data.**

| Number | Age   | Gender | G20 infusion rate | WB insulin sensitivity |
|--------|-------|--------|-------------------|------------------------|
| 1      | 60,00 | 0      | 80,00             | 1,72                   |
| 2      | 51,00 | 1      | 140,00            | 2,11                   |
| 3      | 29,00 | 0      | 10,00             | ,18                    |
| 4      | 50,00 | 1      | 120,00            | 1,81                   |
| 5      | 30,00 | 0      | 80,00             | 1,83                   |
| 6      | 37,00 | 1      | 60,00             | 1,02                   |
| 7      | 54,00 | 1      | 100,00            | 1,69                   |
| 8      | 47,00 | 1      | 30,00             | 0,49                   |
| 9      | 56,00 | 0      | 50,00             | 1,16                   |
| 10     | 52,00 | 0      | 65,00             | 1,29                   |
| 11     | 75,00 | 0      | 60,00             | 0,94                   |
| 13     | 30,00 | 1      | 75,00             | 1,60                   |
| 14     | 58,00 | 1      | 10,00             | 0,22                   |
| 15     | 72,00 | 0      | 150,00            | 2,56                   |
| 16     | 66,00 | 0      | 130,00            | 1,81                   |

| Number | Glucose baseline | Glucose 4 min | Glucose 10 min | Glucose 60 min | Glucose target 90 | Glucose target 60 |
|--------|------------------|---------------|----------------|----------------|-------------------|-------------------|
| 1      | 153,00           | 262,00        | 232,00         | 185,00         | 94,00             | 55,00             |
| 2      | 174,00           | 288,00        | 262,00         | 219,00         | 93,00             | 55,00             |
| 3      | 196,00           | 356,00        | 336,00         | 255,00         | 89,00             | 59,00             |
| 4      | 97,00            | 205,00        | 212,00         | 193,00         | 89,00             | 47,00             |
| 5      | 141,00           | 384,00        | 367,00         | 323,00         | 84,00             | 60,00             |
| 6      | 128,00           | 249,00        | 259,00         | 193,00         | 97,00             | 56,00             |
| 7      | 159,00           | 300,00        | 267,00         | 235,00         | 93,00             | 56,00             |
| 8      | 231,00           | 348,00        | 342,00         | 282,00         | 84,00             | 60,00             |
| 9      | 254,00           | 389,00        | 402,00         | 358,00         | 96,00             | 66,00             |
| 10     | 202,00           | 330,00        | 319,00         | 284,00         | 84,00             | 67,00             |
| 11     | 132,00           | 277,00        | 256,00         | 214,00         | 94,00             | 51,00             |
| 12     | 178,00           | 276,00        | 272,00         | 227,00         | 105,00            | 70,00             |
| 13     | 303,00           | 482,00        | 449,00         | 404,00         | 87,00             | 65,00             |
| 14     | 99,00            | 228,00        | 196,00         | 167,00         | 85,00             | 58,00             |
| 15     | 99,00            | 281,00        | 231,00         | 195,00         | 72,00             | 54,00             |

| Number | Basal insulin dose | Ins baseline | Insulin 4' | Insulin 10' | Insulin 60' | Insulin at glucose 90 | Insulin at glucose 60 |
|--------|--------------------|--------------|------------|-------------|-------------|-----------------------|-----------------------|
| 1      | 14,00              | 18,70        | 13,30      | 14,50       | 13,30       | 70,30                 | 70,90                 |
| 2      | 20,00              | 25,40        | 19,40      | 24,50       | 21,30       | 126,90                | 127,20                |
| 3      | 27,80              | 113,80       | 108,90     | 101,10      | 88,30       | 149,50                | 138,60                |
| 4      | 12,00              | 7,70         | 6,90       | 7,40        | 7,30        | 93,60                 | 81,50                 |
| 5      | 14,00              | 8,40         | 8,00       | 8,20        | 8,10        | 118,00                | 114,30                |
| 6      | 15,00              | 46,00        | 45,90      | 47,20       | 51,90       | 136,20                | 120,90                |
| 7      | 14,00              | 10,90        | 10,70      | 9,30        | 8,10        | 48,00                 | 56,70                 |
| 8      | 18,00              | 31,80        | 28,50      | 27,70       | 24,40       | 88,10                 | 83,50                 |
| 9      | 6,30               | 2,30         | 1,50       | 1,50        | ,80         | 37,00                 | 32,10                 |
| 10     | 11,00              | 8,40         | 8,50       | 8,10        | 6,70        | 55,10                 | 56,70                 |
| 11     | 18,00              | 124,30       | 122,40     | 122,00      | 124,80      | 211,90                | 183,40                |
| 12     | 5,50               | 43,40        | 34,10      | 34,50       | 32,90       | 117,50                | 134,00                |
| 13     | 7,90               | 98,90        | 88,70      | 83,30       | 93,80       | 201,20                | 221,20                |
| 14     | 6,10               | 119,60       | 92,90      | 92,10       | 96,70       | 191,60                | 199,90                |
| 15     | 9,30               | 20,60        | 19,90      | 18,90       | 19,10       | 169,30                | 155                   |

| Number | c-pept baseline | c-pept 4' | c-pept 10' | c-pept 60' | c-pept at gluc 90 | c-pept at gluc 60 |
|--------|-----------------|-----------|------------|------------|-------------------|-------------------|
| 1      | ,10             | ,10       | ,10        | ,10        | ,10               | ,10               |
| 2      | ,10             | ,10       | ,10        | ,10        | ,10               | ,10               |
| 3      | ,10             | ,10       | ,10        | ,10        | ,10               | ,10               |
| 4      | ,10             | ,10       | ,10        | ,10        | ,10               | ,10               |
| 5      | ,10             | ,10       | ,10        | ,10        | ,10               | ,10               |
| 6      | ,50             | ,50       | ,60        | ,80        | ,50               | ,30               |
| 7      | ,10             | ,10       | ,10        | ,10        | ,10               | ,10               |
| 8      | ,10             | ,10       | ,10        | ,10        | ,10               | ,10               |
| 9      | ,10             | ,10       | ,10        | ,10        | ,10               | ,10               |
| 10     | ,30             | ,40       | ,40        | ,40        | ,10               | ,10               |
| 11     | ,10             | ,10       | ,10        | ,10        | ,10               | ,10               |
| 12     | ,10             | ,10       | ,10        | ,10        | ,10               | ,10               |
| 13     | ,10             | ,10       | ,10        | ,10        | ,10               | ,10               |
| 14     | ,10             | ,10       | ,10        | ,10        | ,10               | ,10               |
| 15     | ,10             | ,10       | ,10        | ,10        | ,10               | ,10               |

| Number | Asprosin baseline | Asprosin 10' | Asprosin 60' | Asprosin at gluc 90 | Asprosin at gluc 60 |
|--------|-------------------|--------------|--------------|---------------------|---------------------|
| 1      | 72,26             | 81,90        | 74,72        | 85,44               | 57,13               |
| 2      | 136,10            | 94,75        | 87,33        | 133,60              | 149,49              |
| 3      | 153,32            | 133,76       | 93,75        | 102,14              | 88,37               |
| 4      | 60,18             | 59,99        | 105,85       | 121,94              | 118,32              |
| 5      | 75,27             | 78,48        | 118,76       | 101,42              | 151,02              |
| 6      | 126,51            | 101,25       | 93,93        | 96,86               | 91,06               |
| 7      | 82,99             | 84,82        | 74,21        | 79,31               | 75,32               |
| 8      | 95,43             | 90,79        | 102,19       | 106,85              | 89,59               |
| 9      | 62,53             | 63,79        | 52,44        | 54,60               | 59,65               |
| 10     | 80,19             | 67,02        | 65,90        | 93,98               | 143,27              |
| 11     | 287,98            | 227,31       | 206,20       | 208,52              | 223,09              |
| 12     | 167,93            | 128,12       | 138,38       | 168,64              | 185,80              |
| 13     | 180,95            | 154,15       | 133,12       | 168,38              | 163,87              |
| 14     | 178,02            | 160,52       | 129,70       | 159,40              | 178,10              |
| 15     | 148,54            | 123,61       | 121,14       | 160,78              | 162,25              |

| Number | Cortisol baseline | Cortisol 60' | Cortisol at gluc 60 | ACTH baseline | ACTH 60' | ACTH at gluc 60 |
|--------|-------------------|--------------|---------------------|---------------|----------|-----------------|
| 1      | 176,50            | 98,80        | 37,80               | 16,40         | 10,50    | 9,10            |
| 2      | 163,20            | 105,20       | 61,20               | 23,60         | 17,90    | 16,50           |
| 3      | 168,30            | 171,60       | 133,10              | 21,20         | 28,90    | 24,40           |
| 4      | 87,40             | 59,20        | 67,70               | 11,20         | 8,90     | 9,80            |
| 5      | 192,60            | 111,50       | 83,90               | 20,00         | 12,90    | 15,30           |
| 6      | 255,00            | 113,00       | 46,80               | 18,30         | 5,00     | 6,60            |
| 7      | 101,00            | 69,40        | 93,40               | 8,10          | 5,40     | 10,30           |
| 8      | 125,10            | 88,00        | 76,00               | 14,70         | 13,60    | 19,30           |
| 9      | 128,70            | 65,00        | 75,80               | 17,40         | 12,20    | 20,70           |
| 10     | 179,30            | 113,50       | 75,00               | 12,80         | 9,00     | 8,50            |
| 11     | 107,30            | 96,20        | 96,70               | 32,20         | 26,20    | 24,20           |
| 12     | 199,20            | 112,90       | 42,20               | 20,70         | 13,10    | 9,30            |
| 13     | 148,70            | 123,20       | 84,10               | 14,50         | 14,90    | 13,90           |
| 14     | 185,40            | 143,80       | 87,80               | 32,10         | 17,20    | 17,50           |
| 15     | 168,90            | 104,80       | 80,90               | 22,30         | 15,30    | 13,70           |

| Number | Glucagon baseline | Glucagon 60' | Glucagon at gluc 60 | NA baseline | NA 60'  | NA at gluc 60 |
|--------|-------------------|--------------|---------------------|-------------|---------|---------------|
| 1      | 124,00            | 119,00       | 141,00              | 1255,00     | 1857,00 | 1956,00       |
| 2      | 97,00             | 89,00        | 87,00               | 2067,00     | 1895,00 | 2037,00       |
| 3      | 119,00            | 138,00       | 118,00              | 720,00      | 670,00  | 918,00        |
| 4      |                   |              | 96,00               | 1132,00     | 1566,00 | 2091,00       |
| 5      | 126,00            | 142,00       | 123,00              | 2090,00     | 1589,00 | 2283,00       |
| 6      | 97,00             | 91,00        | 72,00               | 2120,00     | 2314,00 | 3844,00       |
| 7      | 78,00             | 86,00        |                     | 996,00      | 927,00  | 905,00        |
| 8      | 125,00            | 108,00       | 114,00              | 896,00      | 1105,00 | 1903,00       |
| 9      | 132,00            | 109,00       | 91,00               | 1991,00     | 2833,00 | 2677,00       |
| 10     | 125,00            | 128,00       | 117,00              | 1400,00     | 2174,00 | 2299,00       |
| 11     |                   |              |                     | 3460,00     | 2344,00 | 3406,00       |
| 12     |                   |              |                     | 2169,00     | 1621,00 | 1330,00       |
| 13     |                   |              |                     | 1611,00     | 1314,00 | 2358,00       |
| 14     |                   |              |                     | 2947,00     | 1805,00 | 3265,00       |
| 15     |                   |              |                     | 1875,00     | 1624,00 | 2511,00       |

| Number | Adr baseline | Adr 60' | Adr at gluc 60 | dopa baseline | dopa 60' | dopa at gluc 60 |
|--------|--------------|---------|----------------|---------------|----------|-----------------|
| 1      | 695,00       | 82,00   | 82,00          | 837,00        | 1509,00  | 302,00          |
| 2      | 567,00       | 404,00  | 430,00         | 1206,00       | 1541,00  | 1327,00         |
| 3      | 382,00       | 82,00   | 375,00         | 2739,00       | 2505,00  | 1141,00         |
| 4      | 526,00       | 89,00   | 641,00         | 553,00        | 365,00   | 1220,00         |
| 5      | 516,00       | 231,00  | 82,00          | 1971,00       | 1097,00  | 361,00          |
| 6      | 600,00       | 621,00  | 411,00         | 494,00        | 677,00   | 770,00          |
| 7      | 278,00       | 82,00   | 333,00         | 474,00        | 1100,00  | 810,00          |
| 8      | 82,00        | 82,00   | 1235,00        | 3864,00       | 890,00   | 2973,00         |
| 9      | 518,00       | 444,00  | 539,00         | 1195,00       | 1045,00  | 975,00          |
| 10     | 82,00        | 198,00  | 224,00         | 1222,00       | 389,00   | 321,00          |
| 11     | 272,90       | 272,90  | 385,00         | 391,90        | 391,90   | 391,90          |
| 12     | 456,00       | 301,00  | 272,90         | 976,00        | 497,00   | 391,90          |
| 13     | 272,90       | 272,90  | 605,00         | 533,00        | 420,00   | 391,90          |
| 14     | 272,90       | 272,90  | 272,90         | 391,90        | 391,90   | 552,00          |
| 15     | 285,00       | 272,90  | 407,00         | 1110,00       | 808,00   | 391,90          |

| Number | TSH  | Fibroskan<br>kap | Fibroskan<br>IQR | lungdisease | PAD | ABI<br>right | ABI<br>left | Thyroiddisease | Retinopathy<br>Photo | Smoking |
|--------|------|------------------|------------------|-------------|-----|--------------|-------------|----------------|----------------------|---------|
| 1      | ,37  | 4,80             | 1,00             | ,00         | ,00 | ,94          | 1,11        | 1,00           | 1,00                 | ,00     |
| 2      | 1,57 | 4,30             | ,60              | 1,00        | ,00 | 1,11         | 1,09        | ,00            | ,00                  | ,00     |
| 3      | 1,13 | 5,60             | 1,00             | ,00         | ,00 | 1,10         | 1,02        | ,00            | ,00                  | ,00     |
| 4      | 1,16 | 4,40             | ,80              | ,00         | ,00 | 1,22         | 1,10        | ,00            | ,00                  | ,00     |
| 5      | ,18  | 3,50             | 1,10             | ,00         | ,00 | ,99          | 1,02        | 1,00           | ,00                  | ,00     |
| 6      | 1,05 | 6,90             | ,70              | ,00         | ,00 | 1,05         | 1,07        | ,00            | ,00                  | 1,00    |
| 7      | 1,87 | 4,70             | ,20              | ,00         | ,00 | 1,10         | 1,14        | ,00            | 1,00                 | ,00     |
| 8      | 5,11 | 4,60             | ,40              | ,00         | ,00 | 1,08         | 1,06        | 1,00           | 1,00                 | ,00     |
| 9      | 2,23 | 4,10             | 1,10             | ,00         | ,00 | 1,09         | 1,01        | ,00            | ,00                  | ,00     |
| 10     | 1,69 | 4,50             | 1,50             | ,00         | ,00 | 1,10         | 1,17        | ,00            | ,00                  | ,00     |
| 11     | 2,47 | 7,60             | ,80              | ,00         | ,00 | 1,18         | 1,15        | ,00            | ,00                  | ,00     |
| 12     | 1,42 | 4,40             | ,90              | ,00         | ,00 | 1,15         | 1,18        | 1,00           | ,00                  | ,00     |
| 13     | 1,41 | 6,80             | ,60              | ,00         | ,00 | ,95          | ,97         | ,00            | ,00                  | 1,00    |
| 14     | 2,35 | 8,50             | 9,30             | ,00         | ,00 | 1,13         | 1,07        | ,00            | 1,00                 | ,00     |
| 15     | ,31  | 5,40             | ,60              | ,00         | ,00 | 1,14         | 1,16        | 1,00           | ,00                  | ,00     |

| Number | height | weight | BMI  | Hb    | MCV | MCH | MCHC | Crea | GFR    | CKDEPI | LDL | HDL | totChol | TAG    | Lp(a) |
|--------|--------|--------|------|-------|-----|-----|------|------|--------|--------|-----|-----|---------|--------|-------|
| 1      | 176    | 65     | 21   | 11,90 | 91  | 31  | 35   | ,67  | 95,80  |        | 104 | 83  | 213     | 128    | 10,00 |
| 2      | 179    | 85     | 26,5 | 13,60 | 94  | 32  | 35   | ,70  | 109,30 |        | 65  | 86  | 169     | 89,00  | 10,00 |
| 3      | 171    | 86,6   | 29,6 | 14,70 | 88  | 30  | 34   | ,62  | 122,20 |        | 176 | 50  | 261     | 174,00 | 87,14 |
| 4      | 182    | 74     | 22,3 | 13,40 | 92  | 31  | 34   | ,94  | 94,20  |        | 61  | 100 | 170     | 46     | 15,97 |
| 5      | 159    | 72     | 28,5 | 11,80 | 87  | 28  | 32   | ,54  | 127,00 |        | 71  | 65  | 148     | 60,00  | 73,05 |
| 6      | 178    | 70     | 22,1 | 14,50 | 88  | 32  | 36   | ,86  | 110,80 |        | 97  | 42  | 153     | 72,00  | 10,00 |
| 7      | 170    | 75     | 26   | 14,20 | 94  | 33  | 35   | ,79  | 101,80 |        | 85  | 49  | 158     | 121,00 | 29,23 |
| 8      | 174    | 84,6   | 27,9 | 14,60 | 92  | 32  | 35   | ,87  | 102,80 |        | 167 | 40  | 242     | 175,00 | 10,00 |
| 9      | 164    | 62     | 23,1 | 12,50 | 88  | 30  | 34   | ,62  | 101,10 |        | 145 | 82  | 239     | 60,00  | 10,00 |
| 10     | 173    | 63     | 21   | 12,50 | 91  | 30  | 33   | 1,06 | 60,10  |        | 109 | 83  | 207     | 73     | 10,00 |
| 11     | 184    | 86     | 25,4 | 12,30 | 89  | 31  | 35   | 1,56 | 42,80  |        | 110 | 38  | 151     | 61     | 85,04 |
| 12     | 174    | 61     | 20,1 | 13,10 | 89  | 31  | 34   | ,64  | 120,10 |        | 73  | 69  | 148     | 80     | 39,71 |
| 13     | 150    | 87,5   | 38,9 | 11,60 | 88  | 32  | 37   | ,67  | 97,20  |        | 73  | 59  | 158     | 130    |       |
| 14     | 177    | 68     | 21,7 | 12,10 | 87  | 29  | 33   | ,78  | 90,20  |        | 89  | 45  | 124     | 74     | 10,66 |
| 15     | 182    | 103,8  | 31,3 | 14,90 | 84  | 29  | 35   | ,81  | 92,60  |        | 96  | 49  | 165     | 101    | 10,00 |

| Number | hsCRP | ntproBNP | PTH  | Iron  | Tranfsat | Ferritin | GOT | GPT | AP | GGT | HbA1cu | ACR   | RRsys | RRdia |
|--------|-------|----------|------|-------|----------|----------|-----|-----|----|-----|--------|-------|-------|-------|
| 1      | ,16   | 230      | 2,80 | 12,60 | 25       | 44       | 25  | 23  | 81 | 15  | 7,9    | ,70   | 110   | 70    |
| 2      | 2,89  | 40       | 6,00 | 9,10  | 15       | 166      | 33  | 25  | 94 | 42  | 9,0    | ,35   | 121   | 78    |
| 3      | 7,93  | 53       | 1,60 | 14,00 | 25       | 56       | 23  | 22  | 76 | 23  | 8,0    | 2,50  | 116   | 68    |
| 4      | ,41   | 40       | 2,30 | 12,30 | 24       | 112      | 21  | 23  | 66 | 17  | 5,9    | 3,00  | 116   | 73    |
| 5      | 12,40 | 23       | 3,00 | 10,60 | 22       | 105      | 13  | 9   | 71 | 10  | 7,5    | ,37   | 130   | 86    |
| 6      | ,41   | 42       | 2,10 | 27,40 | 52       | 48       | 19  | 16  | 44 | 12  | 6,5    | 3,00  | 118   | 78    |
| 7      | 1,02  | 23       | 8,20 | 11,90 | 19       | 102      | 23  | 21  | 72 | 20  | 7,6    | 1,36  | 160   | 94    |
| 8      | 4,14  | 59       | 4,40 | 8,80  | 18       | 152      | 40  | 50  | 94 | 53  | 8,5    | 3,00  | 129   | 80    |
| 9      | ,68   | 140      | 3,40 | 11,20 | 26       | 110      | 27  | 20  | 73 | 22  | 7,5    | 3,00  | 136   | 83    |
| 10     | ,60   | 108      | 8,80 | 13,60 | 31       | 55       | 19  | 12  | 48 | 8   | 6,5    | 1,11  | 126   | 84    |
| 11     | 6,03  | 319      | 8,50 | 14,70 | 28       | 175      | 18  | 13  | 58 | 12  | 7,5    | 4,03  | 120   | 66    |
| 12     | ,15   | 31       | 3,70 | 19,80 | 29       | 19       | 16  | 7   | 41 | 12  | 6,3    | 8,38  | 110   | 74    |
| 13     | 5,20  | 42       | 7,80 | 16,90 | 27       | 322      | 23  | 33  | 64 | 41  | 8,4    | 61,25 | 158   | 87    |
| 14     | 1,86  | 244      | 6,20 | 14,20 | 27       | 237      | 33  | 24  | 65 | 45  | 7,5    | 3,19  | 123   | 69    |
| 15     | 3,66  | 71       | 5,50 | 16,30 | 38       | 396      | 21  | 26  | 85 | 123 | 7,5    | 3,92  | 139   | 79    |

| Number | hypo<br>unawareness | diabetes<br>duration | NSS | NDS | auton<br>neurop. | statin | ASS | IMT<br>right | IMT<br>left |
|--------|---------------------|----------------------|-----|-----|------------------|--------|-----|--------------|-------------|
| 1      | 0                   | 46,00                | 1   | 6   | 1,               | 1      | 1   | ,50          | ,50         |
| 2      | 1                   | 26,00                | 0   | 2   | 0                | 1      | 0   | ,50          | ,40         |
| 3      | 0                   | 22,00                | 0   | 0   | 0                | 0      | 0   | ,40          | ,40         |
| 4      | 1                   | 24,00                | 0   | 0   | 0                | 0      | 0   | ,47          | ,59         |
| 5      | 0                   | 19,00                | 0   | 0   | 0                | 0      | 0   | ,50          | ,50         |
| 6      | 0                   | 2,00                 | 0   | 0   | 0                | 0      | 0   | ,50          | ,50         |
| 7      | 1                   | 30,00                | 0   | 2   | 0                | 1      | 0   | ,90          | ,50         |
| 8      | 1                   | 20,00                | 4   | 0   | 0                | 0      | 0   | ,50          | ,60         |
| 9      | 1                   | 31,00                | 0   | 2   | 0                | 0      | 0   | ,60          | ,60         |
| 10     | 0                   | 36,00                | 0   | 0   | 0                | 0      | 0   | ,50          | ,60         |
| 11     | 1                   | 51,00                | 5   | 4   | 0                | 1      | 1   | ,74          | ,62         |
| 12     | 0                   | 12,00                | 0   | 0   | 0                | 0      | 0   | ,40          | ,40         |
| 13     | 0                   | 22,00                | 0   | 2   | 0                | 0      | 0   | ,55          | ,65         |
| 14     | 0                   | 34,00                | 0   | 6   | 0                | 1      | 0   | 1,17         | 1,05        |
| 15     | 1                   | 20,00                | 6   | 10  | 0                | 0      | 0   | ,67          | ,96         |

| Number | phase angle | BCM   | FFM   | Cells | Water balance | Fat mass | Body water | US steatosis |
|--------|-------------|-------|-------|-------|---------------|----------|------------|--------------|
| 1      | 5,50        | 22,60 | 46,60 | 48,50 | 30,30         | 18,40    | 30,90      | 0            |
| 2      | 6,90        | 36,50 | 66,20 | 55,10 | -20,70        | 18,80    | 48,90      | 0            |
| 3      | 6,80        | 30,20 | 55,20 | 54,70 | -28,50        | 31,40    | 38,60      | 1            |
| 4      | 6,50        | 35,40 | 66,40 | 53,30 | ,00           | 7,60     | 48,50      | 1            |
| 5      | 6,10        | 22,50 | 43,70 | 51,60 | -24,30        | 28,30    | 31,90      | 0            |
| 6      | 7,20        | 33,00 | 58,70 | 56,20 | -49,50        | 11,30    | 41,50      | 1            |
| 7      | 6,90        | 32,60 | 59,30 | 54,90 | -32,90        | 15,70    | 43,20      | 0            |
| 8      | 6,10        | 31,60 | 61,20 | 51,60 | 22,90         | 23,40    | 46,80      | 0            |
| 9      | 5,20        | 20,40 | 43,20 | 47,20 | 39,80         | 18,80    | 31,90      | 0            |
| 10     | 6,90        | 27,80 | 50,50 | 55,00 | -51,20        | 12,50    | 34,60      | 0            |
| 11     | 4,70        | 27,90 | 63,50 | 44,00 | 171,30        | 22,50    | 47,10      | 0            |
| 12     | 6,70        | 25,50 | 47,00 | 54,20 | -61,80        | 14,00    | 30,00      | 0            |
| 13     | 5,60        | 22,10 | 45,20 | 48,90 | 54,80         | 42,30    | 36,30      | 1            |
| 14     | 4,90        | 26,60 | 58,50 | 45,50 | 120,10        | 9,50     | 44,60      | 1            |
| 15     | 6,70        | 39,00 | 72,00 | 54,20 | 1,30          | 31,80    | 51,70      | 1            |
